# Supplementary material for: Rituximab in patients with rheumatoid arthritis in routine practice (GERINIS): six-year results from a prospective, multicentre, non-interventional study in 2,484 patients
Source: PubMed Central journal article supplement (PMC4060207; doi:10.1186/ar4521), 2014-03-26
Supplement: ar4521-S1.pdf [file ar4521-S1.pdf]

## Additional file 1

### List of study investigators and sites

|                                                                                   |
|-----------------------------------------------------------------------------------|
| Ben Abendroth, Jena                                                               |
| Mohammed Al-Azem, Lohne                                                           |
| Sebastian Albert, Offenburg                                                       |
| Karl Alliger, Zwiesel                                                             |
| Bianca Andermann, RPB Rheuma Projekt Berlin Brandenburg, Berlin                   |
| Peer M. Aries, Hamburg-Altona                                                     |
| Christoph Baerwald, Universität Leipzig Medizinische Fakultät, Leipzig            |
| Sabine Balzer, Bautzen                                                            |
| Erich Bärlin, Ludwigsburg                                                         |
| Peter Bartz-Bazzanella, Klinik für Internistische Rheumatologie, Würselen         |
| Christine Baumann, Plauen                                                         |
| Detlef Becker-Capeller, Stade                                                     |
| Wulf-Dieter Behnert, Kassel                                                       |
| Frank Behrens, Klinikum der Johann Wolfgang Goethe Universität, Frankfurt am Main |
| Walter Behringer, Herz-Jesu-Krankenhaus, Fulda                                    |
| Michaela Bellm, Bruchsal                                                          |
| Sylvia Berger, Naunhof                                                            |
| Raoul Bergner, Klinikum der Stadt Ludwigshafen, Ludwigshafen                      |
| Michaela Berndt, Dietrich-Bonhoeffer-Klinikum, Neubrandenburg                     |
| Werner A. Biewer, Saarbrücken                                                     |
| Stephanie Böddeker, Marl                                                          |
| Stefan Boecker, Frankfurt                                                         |
| Martin Bohl-Bühler, Potsdam                                                       |
| Wilfried Bott, Soltau                                                             |
| Anke Böttger, Landau/Pfalz                                                        |
| Axel Brand, Schlangenbad                                                          |
| Jürgen Braun, Rheumazentrum Ruhrgebiet, St. Josefs-Krankenhaus, Herne             |
| Elke Bräunig, Kahla                                                               |
| Reinhard Bruhn, MEDIAN KLINIK Bad Sülze, Bad Sülze                                |
| Gerd-Rüdiger Burmester, Charité Campus Mitte, Berlin                              |
| Ewa Chwistek, RPB Rheuma Projekt Berlin Brandenburg, Berlin                       |
| Ina Dahmann, Göttingen                                                            |
| Winfried Demary, Hildesheim                                                       |
| Rainer Dockhorn, Weener                                                           |
| Ines Dornacher, Heidelberg                                                        |
| Elke Drexler, Mönchengladbach                                                     |
| Roman Eder, Deggendorf                                                            |
| Andreas Engel, Stuttgart                                                          |
| Jörg Engels, Koblenz                                                              |
| Thomas Feist, Halle                                                               |

|                                                                                    |
|------------------------------------------------------------------------------------|
| Eleonore Fiedler, Nordhausen                                                       |
| Christoph Fiehn, Rheumazentrum Baden-Baden GmbH, Baden-Baden                       |
| Paul Flaxenberg, Essen                                                             |
| Karin Fleßa, Hof/Saale                                                             |
| Gerhard Fliedner, Osnabrück                                                        |
| Ivan Foeldvari, Hamburg                                                            |
| Johannes Frey, Neuburg a. d. Donau                                                 |
| Henry Fricke-Wagner, Zwickau                                                       |
| Petra Fuchs, Augsburg                                                              |
| Arne Gäfgen, Knappschafts Krankenhaus Bottrop, Bottrop                             |
| Ino K. Gao, Heidelberg                                                             |
| Georg Gauler, Osnabrück                                                            |
| Angela Gause, Hamburg                                                              |
| Thomas Geiler, Klinik an der Weißenburg, Uhlstädt-Kirchhasel                       |
| Lars Gerlach, Niefern-Oeschelbronn                                                 |
| Andreas Göbel, Lippstadt                                                           |
| Karl-Heinz Göttl, Passau                                                           |
| Anett Gräßler, Pirna                                                               |
| Conny Ullrich Günther, Krankenhaus Waltershausen Friedrichroda GmbH, Friedrichroda |
| Judith Günzel, Dortmund                                                            |
| Irmgard Gürtler, Neuss                                                             |
| Bernd Häckel, Frankenberg                                                          |
| Kora Hahn, Bezirksklinikum Obermain, Ebensfeld                                     |
| Frank Hamann, Leipzig                                                              |
| Johannes Häntsch, Darmstadt                                                        |
| Peter Härle, St. Vincenz-und-Elisabeth-Hospital, Mainz                             |
| Werner Harmuth, Marktredwitz                                                       |
| Roland Haux, Berlin                                                                |
| Reinhard Hein, Nienburg                                                            |
| Carl-Johannes Heinmüller, Wuppertal                                                |
| Stefan Heitmann, Marienhospital Stuttgart, Stuttgart                               |
| Martin Hesse, Bad Kreuznach                                                        |
| Guido Hoese, Stadthagen                                                            |
| Maria Höhle, Hamburg                                                               |
| Ann-Dörthe Holst, Ludwigslust                                                      |
| Peter Hrdlicka, Zeisigwaldkliniken Bethanien, Chemnitz                             |
| Georg Hübner, Lingen                                                               |
| Steffen Illies, Schwerte                                                           |
| Swen H. Jacki, Tübingen                                                            |
| Wolf-Oliver Jordan, Lehrte                                                         |
| Ulf Kaeding, Parchim                                                               |
| Irmgard Kamilli, München                                                           |
| Andreas Kapelle, Hoyerswerda                                                       |
| Kirsten Karberg, Berlin                                                            |
| Thomas Karger, Köln                                                                |
| Ulrich Käßer, Gießen                                                               |

|                                                                        |
|------------------------------------------------------------------------|
| Peter Kästner, Erfurt                                                  |
| Jörg Kaufmann, Ludwigsfelde                                            |
| Herbert Kellner, München                                               |
| Gernot Keyßer, Martin-Luther-Universität Halle-Wittenberg, Halle/Saale |
| Hans-Peter Klein, Neustadt                                             |
| Thilo Klopsch, Neubrandenburg                                          |
| Michael Koch, Erfurt                                                   |
| Ingrid Kölnberger, Bogen                                               |
| Gernot Kratzsch, Ulm                                                   |
| Holger Krauel, Asklepios Klinik f. Innere Medizin, Weißenfels          |
| Dietmar Krause, Gladbeck                                               |
| Jens-Olaf Krause, Regensburg                                           |
| Lutz Kriegel, Nürnberg                                                 |
| Eveline Krieger-Dippel, München                                        |
| Brigitte Krummel-Lorenz, Frankfurt                                     |
| Cornelia Kühne, Haldensleben                                           |
| Heinz-Jürgen Lakomek, Johannes Wesling Klinikum Minden, Minden         |
| Hans-Eckhard Langer, Düsseldorf                                        |
| Andreas Lauffer, Karlsruhe                                             |
| Karin Leumann, Riesa                                                   |
| Anke Liebhaber, Halle/Saale                                            |
| Thomas Linde, Halle/Saale                                              |
| Gabriele Lorenz, Chemnitz                                              |
| Hanns-Martin Lorenz, Uniklinik Heidelberg, Heidelberg                  |
| Kirsten Lüthke, Dresden                                                |
| Ulrich Maaß, Güstrow                                                   |
| Jozo Majdandzic, Mainz                                                 |
| Anja Maltzahn, Kassel                                                  |
| Helga Manschwetus, Braunschweig                                        |
| Thomas Marycz, Amberg                                                  |
| Johannes Mattar, Überlingen                                            |
| Ursula Mauß-Etzler, Karlsruhe                                          |
| Lothar Mayer, Bad Staffelstein                                         |
| Werner-Johannes Mayet, Nordwest-Krankenhaus Sanderbusch, Sande         |
| Lothar Meier, Hofheim                                                  |
| Adelheid Melzer, Seesen                                                |
| Hans-Jürgen Menne, Dortmund                                            |
| Eckart Möbius, Schwerin                                                |
| Harald Mörtlbauer, Städt. Klinikum München GmbH, München               |
| Michael Müller, Freiberg                                               |
| Gerhard-Anton Müller, Georg-August-Universität, Göttingen              |
| Ulf Müller-Ladner, Kerckhoff-Klinik Forschungsgesell.GmbH, Bad Nauheim |
| Alexander Natusch, Berlin*                                             |
| Gunther Neeck, Biomedro, Bad Doberan                                   |
| Joachim Neuwirth, Norderstedt                                          |
| Gabriele Niederbiermann-Koczy, Steinhagen                              |

|                                                                        |
|------------------------------------------------------------------------|
| Elisabeth Niewersch, Marburg                                           |
| Mathias Nitsch, Waldkrankenhaus Rudolf Elle, Eisenberg                 |
| Ernst Nitsche, Regensburg                                              |
| Hubert Nüßlein, Nürnberg                                               |
| Wolfgang Ochs, Bayreuth                                                |
| Matthias Oelsner, Gera                                                 |
| Peter Oelzner, FSU Klinik f. Innere Medizin III, Jena                  |
| Artur Operhalski, Kreisklinik Aschersleben/Staßfurt, Aschersleben      |
| Dorothea Pick, Bad Neuenahr                                            |
| Manfred Piegsa, Gießen                                                 |
| Andreas Reck, Mittelherwigsdorf                                        |
| Sven Remstedt, Berlin                                                  |
| Matthias Richter, Rostock                                              |
| Constanze Richter, Stuttgart                                           |
| Beate Roch, Dresden                                                    |
| Karin Rockwitz, Goslar                                                 |
| Bernhard Rößner, Erfurt                                                |
| Ekkehard Röther, Donaueschingen                                        |
| Andrea Rubbert-Roth, Uniklinik Köln, Köln                              |
| Herwig Rumpel, Regensburg                                              |
| Gernot Scheibl, Paderborn                                              |
| Georg Schett, Universitätsklinikum Erlangen, Erlangen                  |
| Heinz Schleenbecker, Rheumazentrum Mittelhessen GmbH & KG, Bad Endbach |
| Thomas Schleiffer, Wilhelmshaven                                       |
| Maria-Anna Schleußner, Heilbad Heiligenstadt                           |
| Albert Schmid, Bielefeld                                               |
| Hagen Schmidt, Berlin                                                  |
| Reinhold-Ernst Schmidt, Med. Hochschule Hannover, Hannover             |
| Matthias Schneider, Universitätsklinikum Düsseldorf, Düsseldorf        |
| Ulrich Schoo, Rheine                                                   |
| Andreas Schramm, Freiburg                                              |
| Agnes-Lotte Schrepler-Konya, Mannheim                                  |
| Frank Schumann, Reken                                                  |
| Andreas Schwarting, Uniklinik Mainz, Mainz                             |
| Ilka Schwarze, Leipzig                                                 |
| Cornelia Schweder, Hagen                                               |
| Reiner Schwenke, Dresden                                               |
| Gudrun Schwenke, Johanniter Krankenhaus, Treuenbrietzen                |
| Carola Schwerdt, Dessau                                                |
| Angela Seifert, Immanuel Krankenhaus GmbH, Berlin                      |
| Marco Semmler, Klinikum Südstadt, Rostock                              |
| Helmut Sörensen, RPB Rheuma Projekt Berlin Brandenburg, Berlin         |
| Christof Specker, Kliniken Essen-Süd, Essen                            |
| Wolfgang Spieler, Zerbst                                               |
| Marie-Luise Stadelmann, Wittlich                                       |
| Elisabeth Ständer, Schwerin                                            |

|                                                                              |
|------------------------------------------------------------------------------|
| Carsten Stille, Hannover                                                     |
| Frank Striesow, Bonn                                                         |
| Harald Strothmeyer, Düsseldorf                                               |
| Johannes Strunk, Krankenhaus Köln - Porz, Köln                               |
| Martin Talke, Berlin                                                         |
| Andreas Teipel, Leverkusen                                                   |
| Astrid Thiele, St. Josefs-Zentrum für Orthopädie u. Rheumatologie, Wuppertal |
| Wolfgang Thies, Herrsching                                                   |
| Hans-Peter Tony, Medizinische Klinik und Poliklinik II, Würzburg             |
| Andreas Trabandt, Kreiskrankenhaus Demmin, Demmin                            |
| Frank Trautmann, Mainz                                                       |
| Harald Tremel, Hamburg                                                       |
| Igor Turin, Karlstadt                                                        |
| Paul Veress, Mönchengladbach                                                 |
| Reiner Vogt, Petershagen                                                     |
| Andreas Völker, Ahlen                                                        |
| Markus Vollmer, Mönchengladbach                                              |
| Ulrich von Hinüber, Hildesheim                                               |
| Hubertus von Wilmowsky, Knappschafts-Krankenhaus, Püttlingen                 |
| Jan Voswinkel, Universitätsklinikum des Saarlandes, Homburg                  |
| Peter Wagener, Nienburg                                                      |
| Jürgen Währisch, Essen                                                       |
| Jochen Walter, Rendsburg                                                     |
| Uta Walter, Salzwedel                                                        |
| Siegfried Wassenberg, Ratingen                                               |
| Sven Weidner, Stuttgart                                                      |
| Martin Welcker, Planegg                                                      |
| Jörg Wendler, Erlangen                                                       |
| Barbara Wenzel, Immanuel Krankenhaus GmbH, Berlin                            |
| Maria Westerhoff, Rheinfeldern                                               |
| Jens Westphal, Schramberg-Sulgen                                             |
| Elke Wilden, Köln                                                            |
| Peter Willeke, Kooperatives Rheumazentrum Münster e. V., Münster             |
| Stefan Wolf, Sinsheim                                                        |
| Wolf-Dieter Wörth, Wiesbaden                                                 |
| Michael Zänker, Rheumazentrum Nord-Brandenburg e.V., Bernau                  |
| Silke Zinke, Berlin                                                          |

Deceased.
